# Supplementary material for: A multi-gene phylogeny of Chlorophyllum (Agaricaceae, Basidiomycota): new species, new combination and infrageneric classification
Source: PubMed Central journal article supplement (PMC5904524; doi:10.3897/mycokeys.32.23831), 2018-03-20

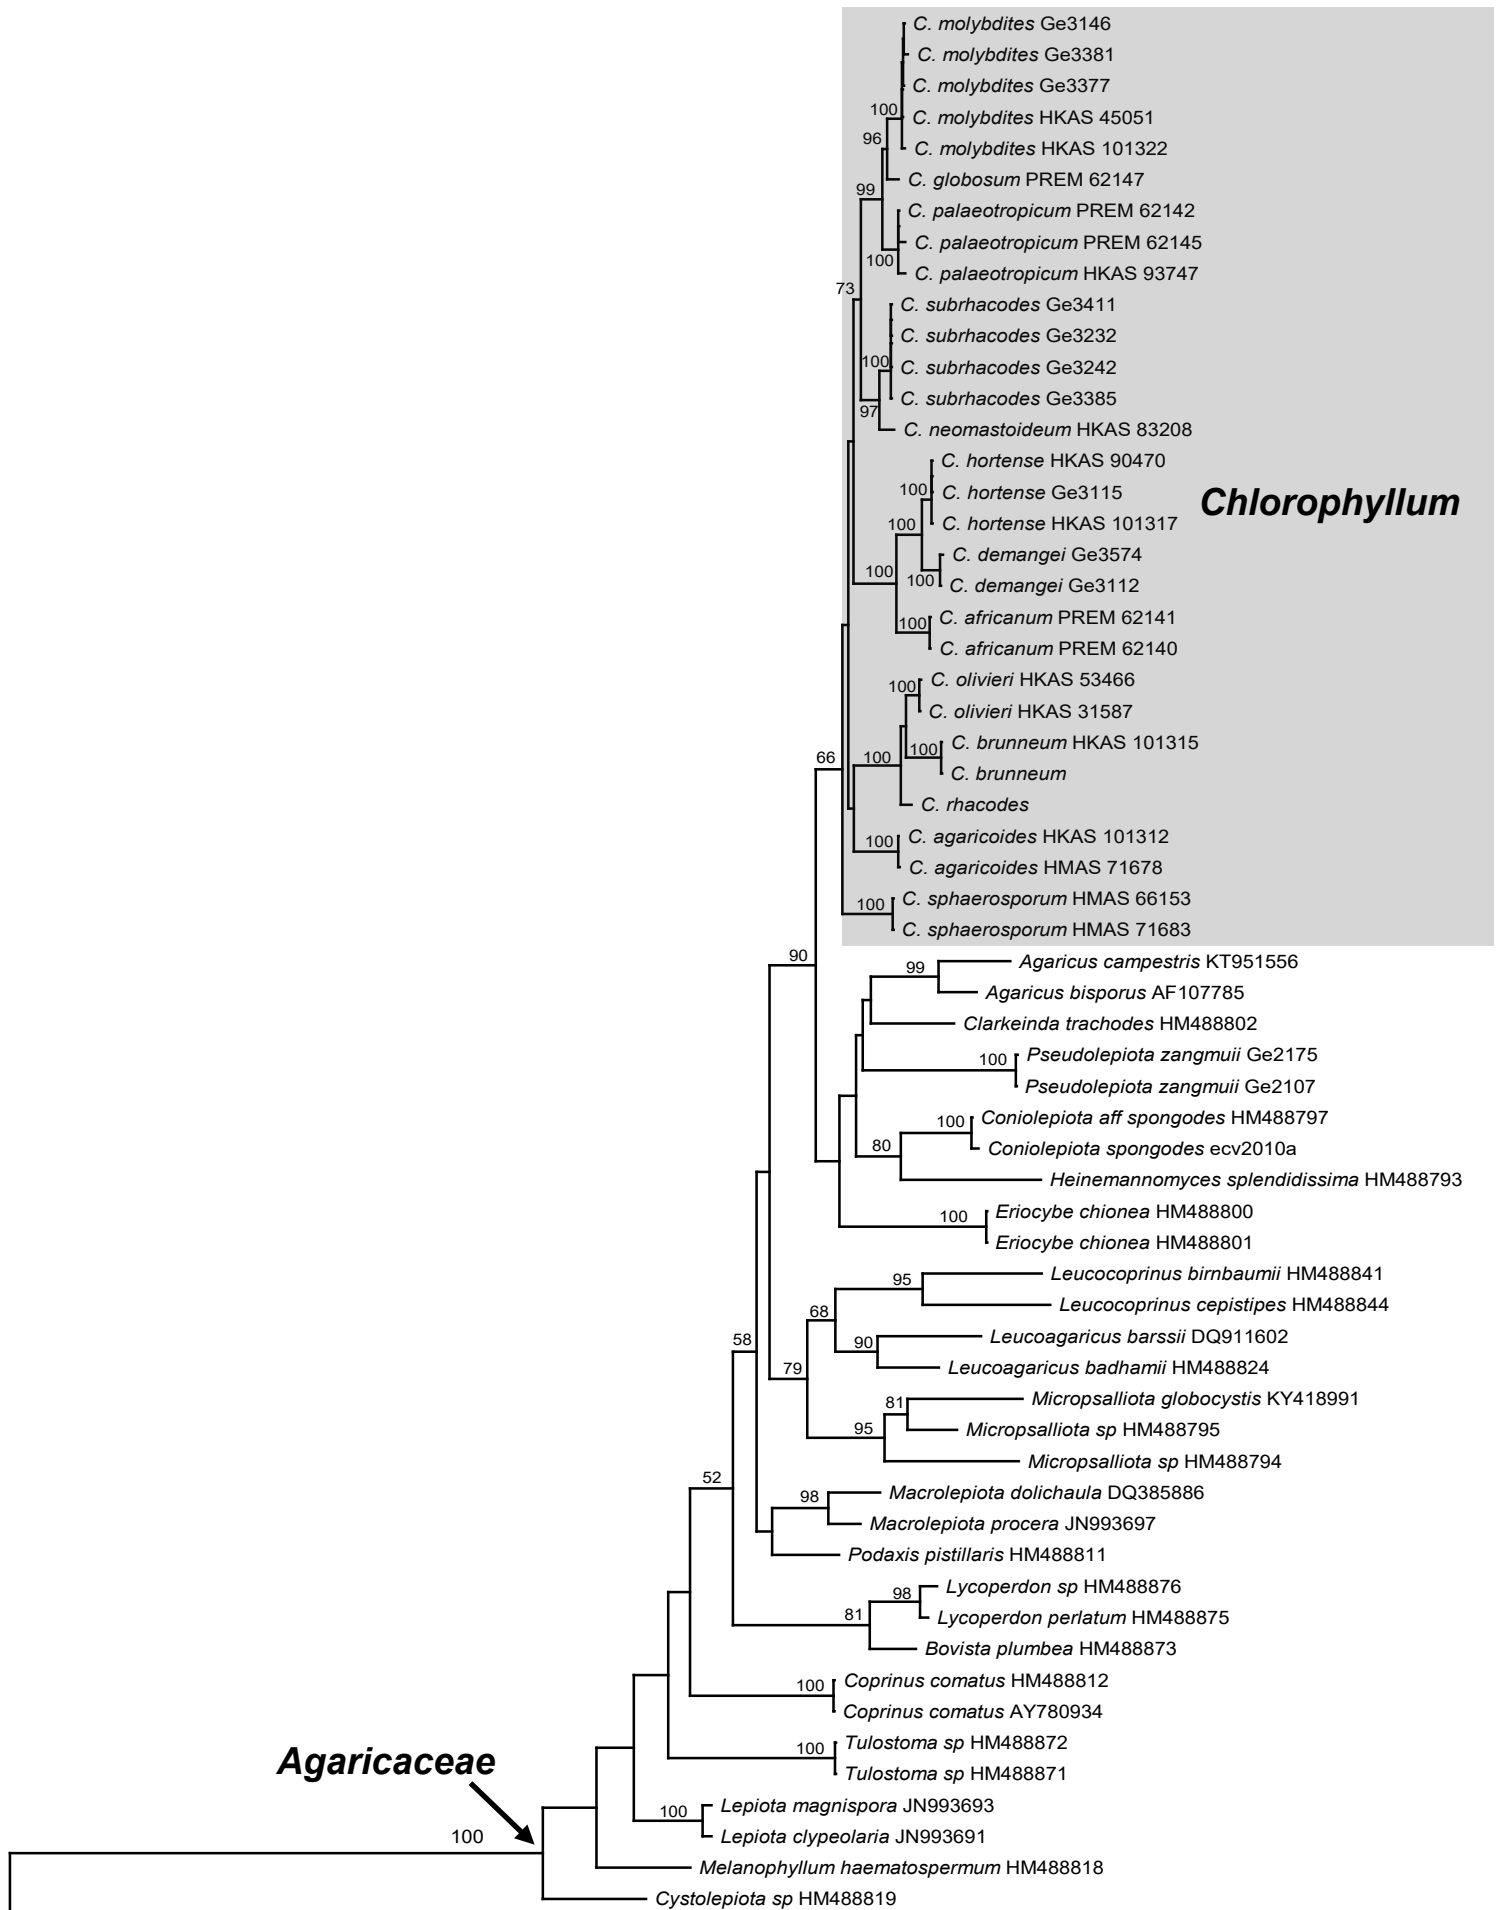

Supplement: mycokeys-32-065-s001.pdf [file mycokeys-32-065-s001.pdf]
